# Supplementary material
Source: PubMed Central journal article supplement (PMC3971758)

## SUPPORTING INFORMATION

### Sesquiterpenes from *Neurolaena lobata* and Their Antiproliferative and Anti-inflammatory Activities

Ildikó Lajter,<sup>†</sup> Andrea Vasas,<sup>†</sup> Zoltán Béni,<sup>‡</sup> Peter Forgo,<sup>†</sup> Markus Binder,<sup>§</sup> Valery Bochkov,<sup>§</sup>  
István Zupkó,<sup>⊥</sup> Georg Krupitza,<sup>||</sup> Richard Frisch,<sup>∇</sup> Brigitte Kopp,<sup>°</sup> and Judit Hohmann<sup>\*,†</sup>

<sup>†</sup> Department of Pharmacognosy, University of Szeged, H-6720 Szeged, Hungary

<sup>‡</sup> Spectroscopic Research, Gedeon Richter Plc., H-1103 Budapest, Hungary

<sup>§</sup> Department of Vascular Biology and Thrombosis Research, Center of Physiology and  
Pharmacology, Medical University of Vienna, A-1090 Vienna, Austria

<sup>⊥</sup> Department of Pharmacodynamics and Biopharmacy, H-6720 Szeged, Hungary

<sup>||</sup> Clinical Institute of Pathology, Medical University of Vienna, A-1090 Vienna, Austria

<sup>∇</sup> Institute for Ethnobiology, GT-170 San José/Petén, Guatemala

<sup>°</sup> Department of Pharmacognosy, University of Vienna, A-1090 Vienna, Austria

#### Correspondence

\* To whom correspondence should be addressed. Tel: +36 62 546453. Fax: +36 62 545704. E-mail: hohmann@pharm.u-szeged.hu.

Special issue: “Dedicated to Prof. Dr. Otto Sticher, of ETH-Zurich, Zurich, Switzerland, for his pioneering work in pharmacognosy and phytochemistry”.

## Content

|                                                                                           |     |
|-------------------------------------------------------------------------------------------|-----|
| <sup>1</sup> H NMR Spectrum of Neurolobatin A (1)                                         | S2  |
| <sup>13</sup> C NMR Spectrum of Neurolobatin A (1)                                        | S3  |
| <sup>1</sup> H NMR Spectrum of Neurolobatin B (2)                                         | S4  |
| <sup>13</sup> C NMR Spectrum of Neurolobatin B (2)                                        | S5  |
| <sup>1</sup> H NMR Spectrum of 5β-Hydroxy-8β-isovaleroyloxy-9α-hydroxy-calyculatolide (3) | S6  |
| HMBC Spectrum of 5β-Hydroxy-8β-isovaleroyloxy-9α-hydroxy-calyculatolide (3)               | S7  |
| <sup>1</sup> H NMR Spectrum of 3-Epi-desacetyl-isovaleroylheliangine (4)                  | S8  |
| JMOD Spectrum of 3-Epi-desacetyl-isovaleroylheliangine (4)                                | S9  |
| <sup>1</sup> H NMR Spectrum of 3β-Acetoxy-8β-isovaleroyloxyreynosin (5)                   | S10 |
| JMOD Spectrum of 3β-Acetoxy-8β-isovaleroyloxyreynosin (5)                                 | S11 |

<sup>1</sup>H NMR Spectrum of Neurolobatin A (1) in CDCl<sub>3</sub>

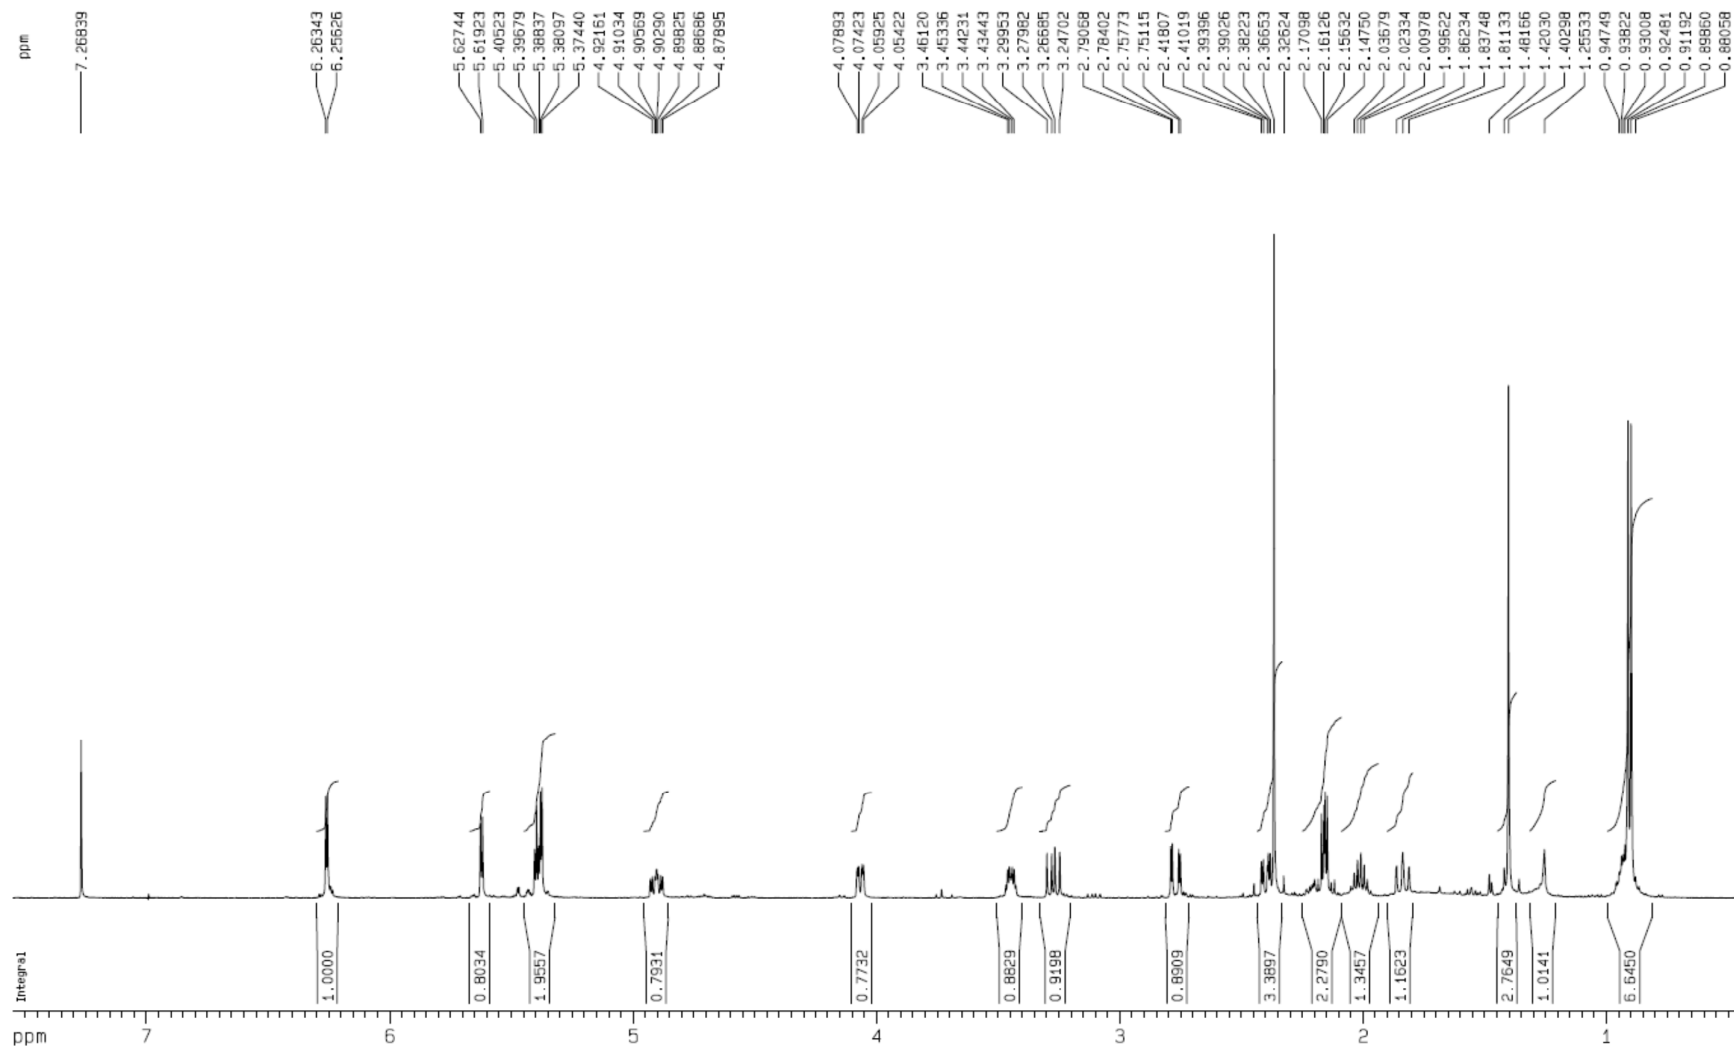

$^{13}\text{C}$  NMR Spectrum of Neurolobatin A (1) in  $\text{CDCl}_3$

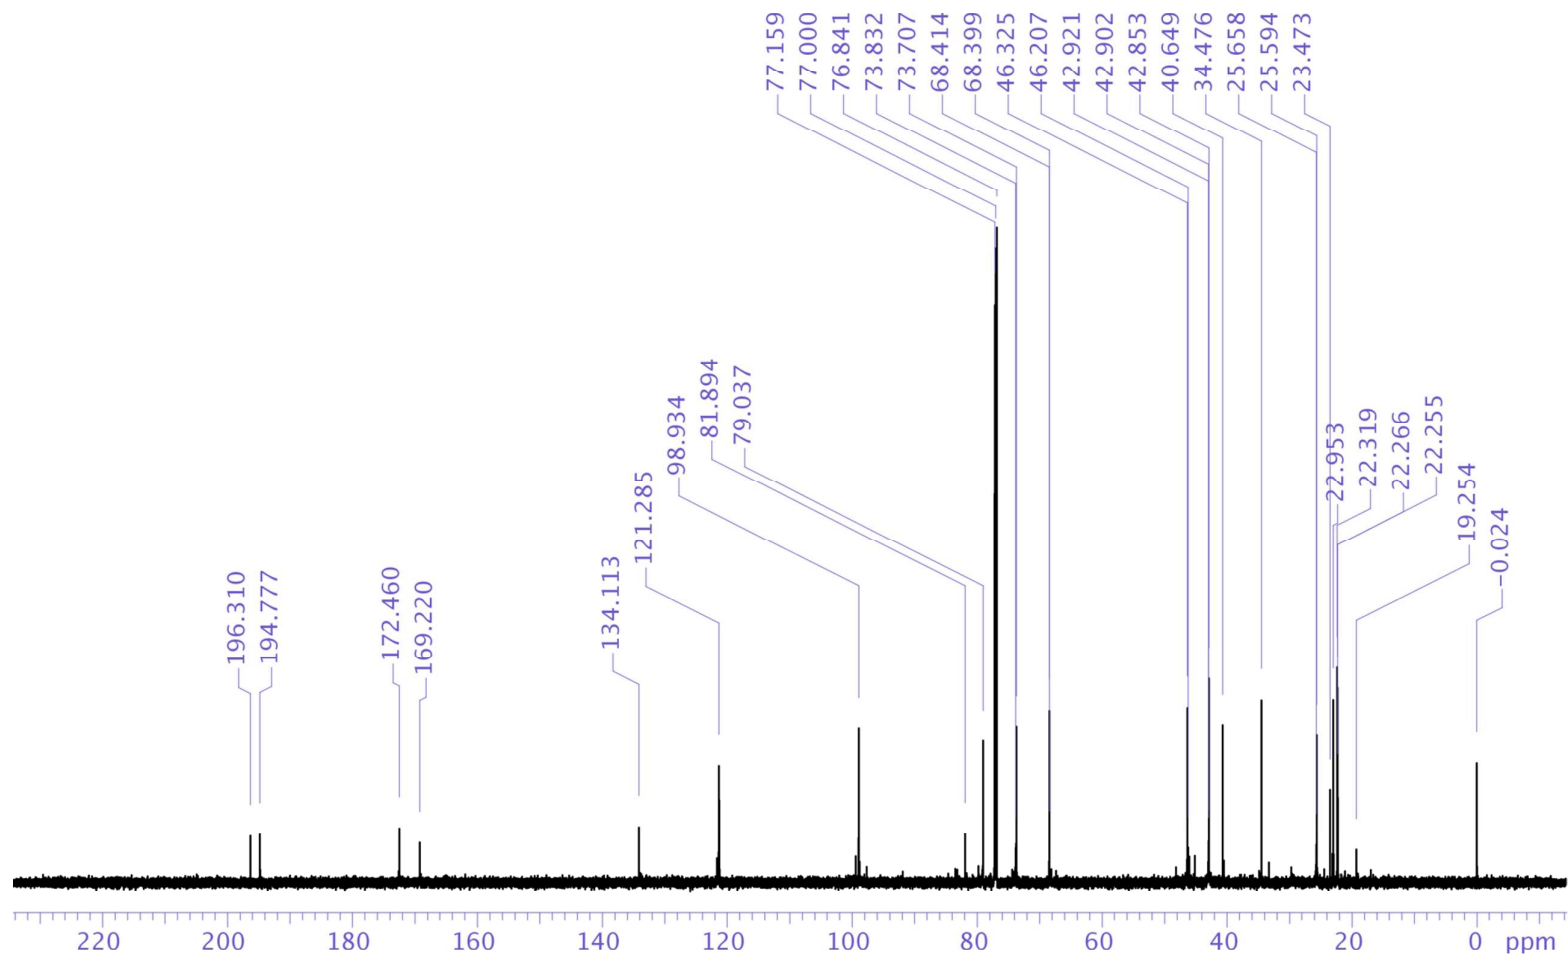

<sup>1</sup>H NMR Spectrum of Neurolobatin B (2) in CDCl<sub>3</sub>

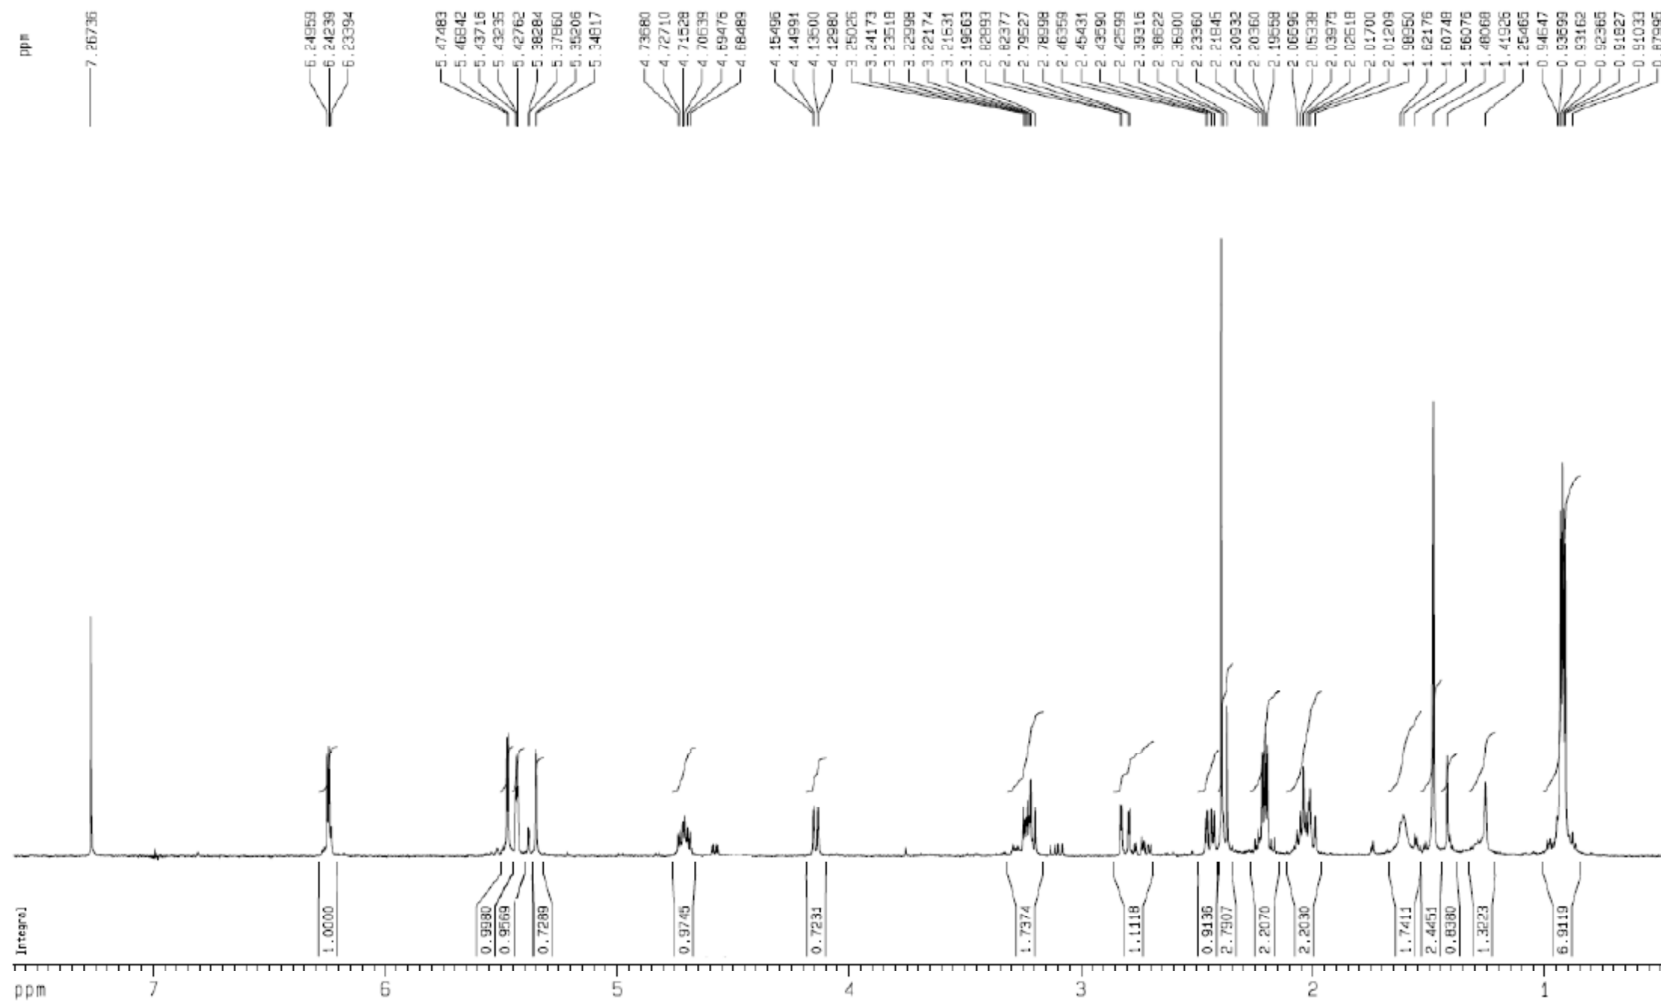

$^{13}\text{C}$  NMR Spectrum of Neurolobatin B (**2**) in  $\text{CDCl}_3$

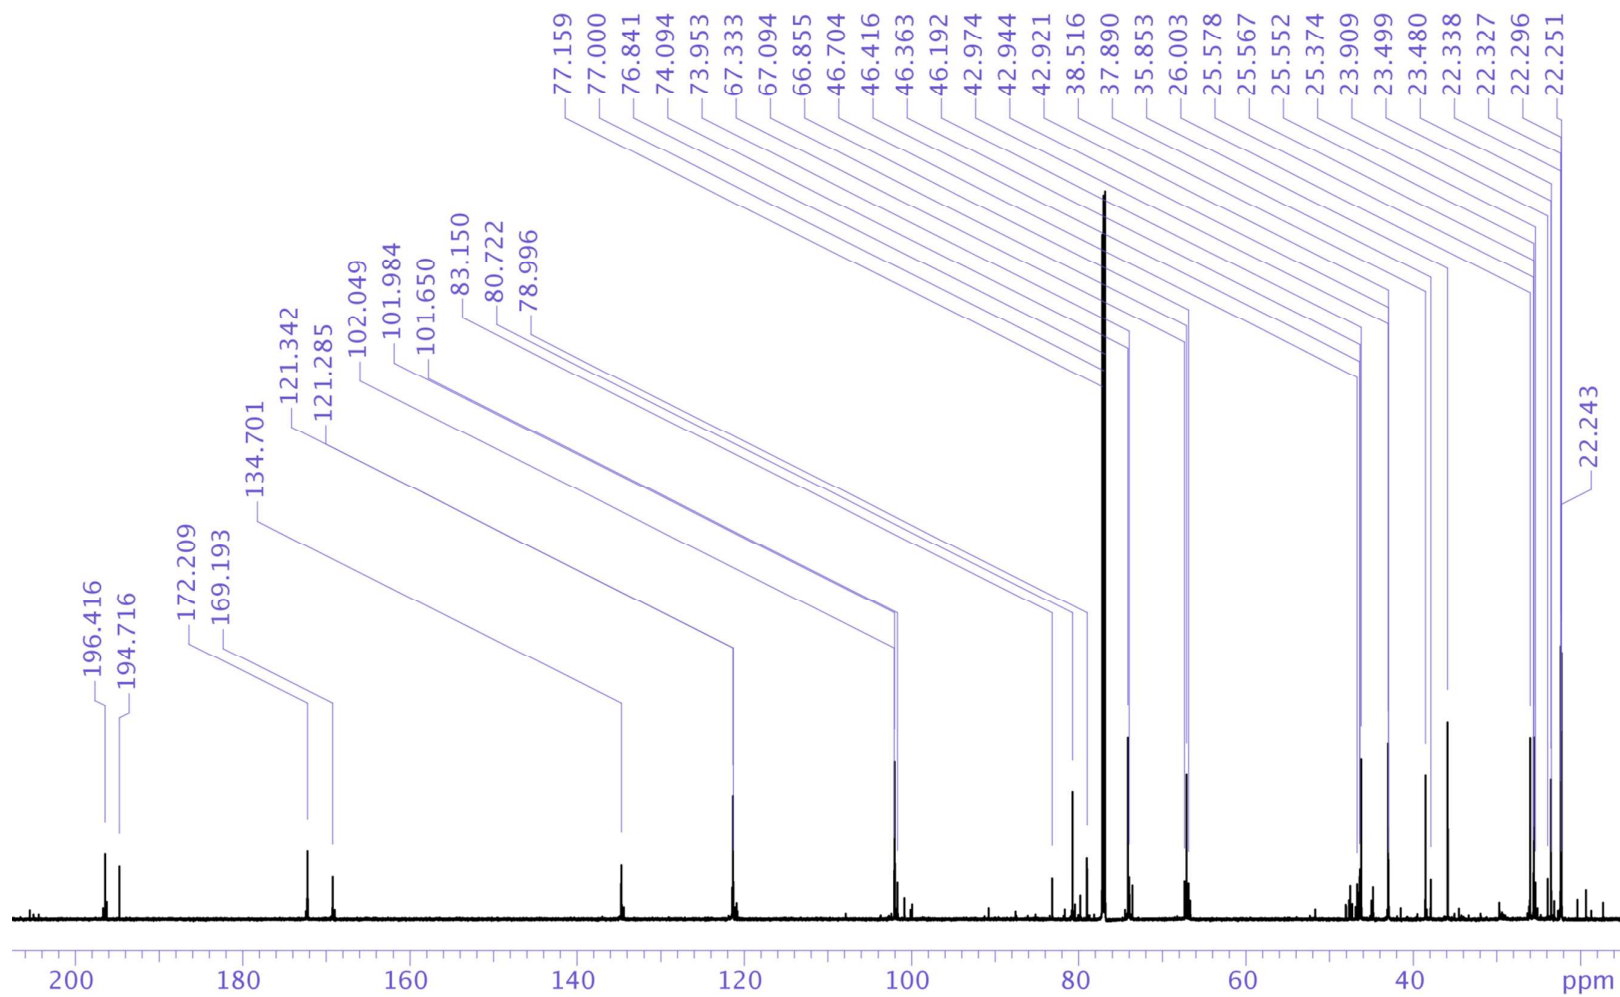

$^1\text{H}$  NMR Spectrum of  $5\beta$ -Hydroxy- $8\beta$ -isovaleroyloxy- $9\alpha$ -hydroxy-calyculatolide (**3**)

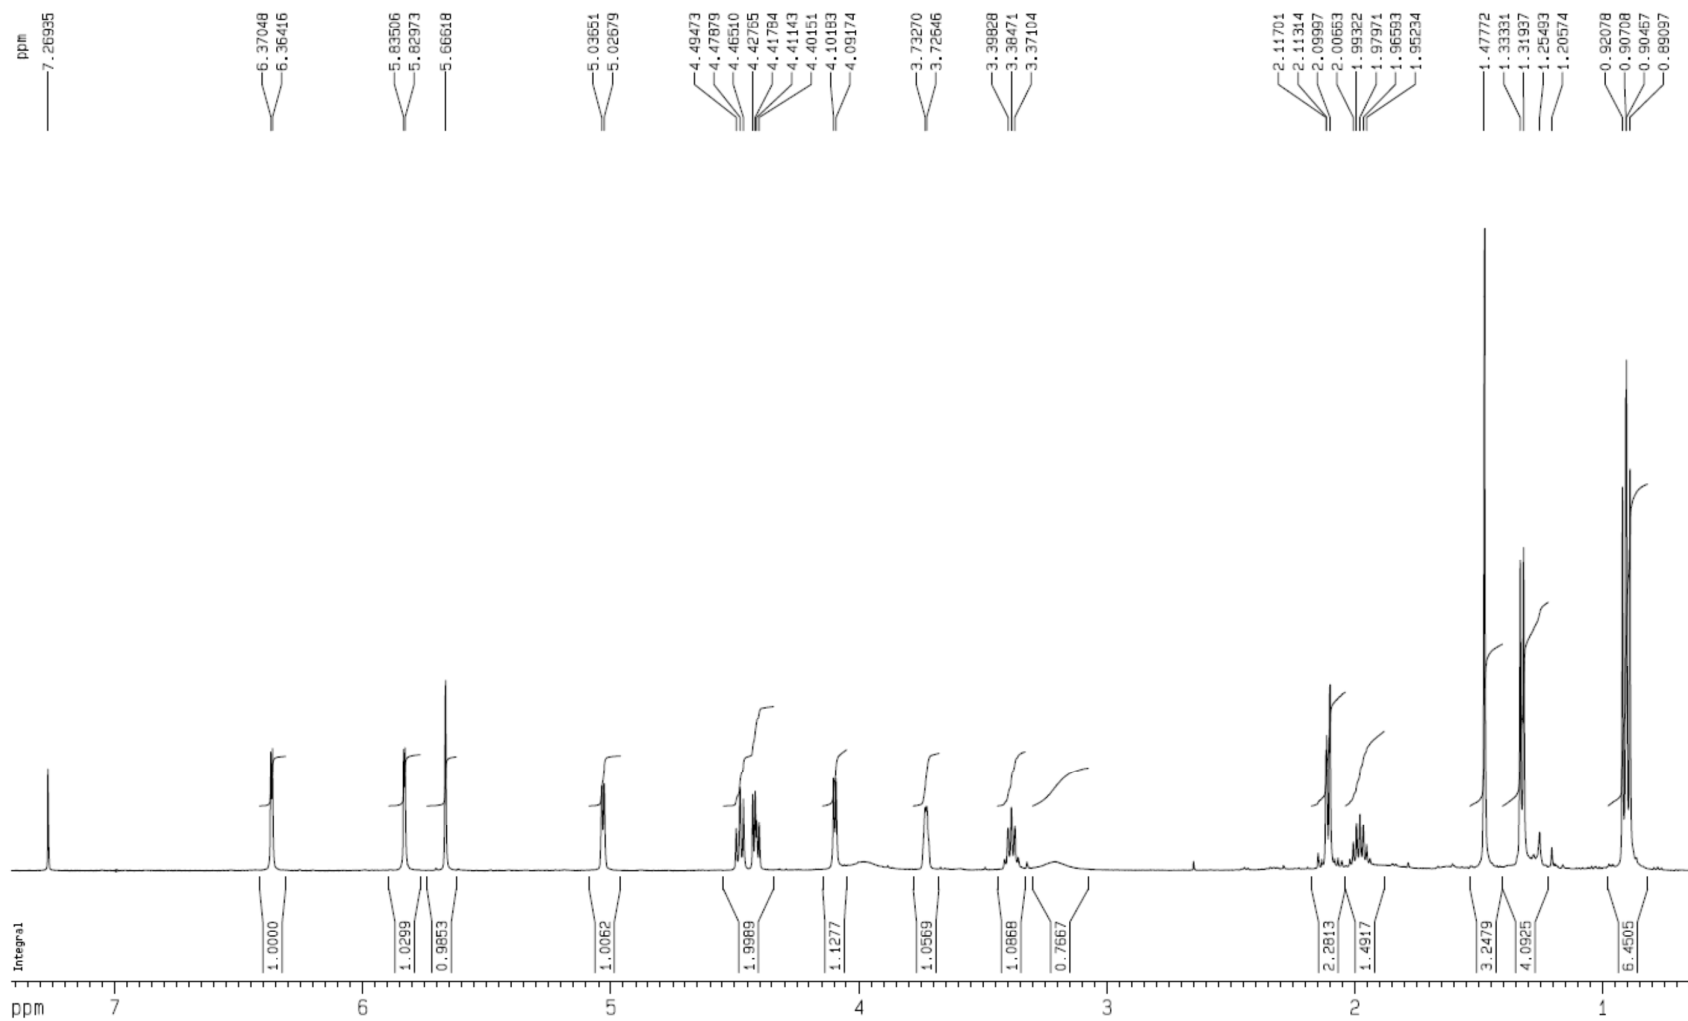

HMBC Spectrum of  $5\beta$ -Hydroxy- $8\beta$ -isovaleroyloxy- $9\alpha$ -hydroxy-calyculatolide (3)

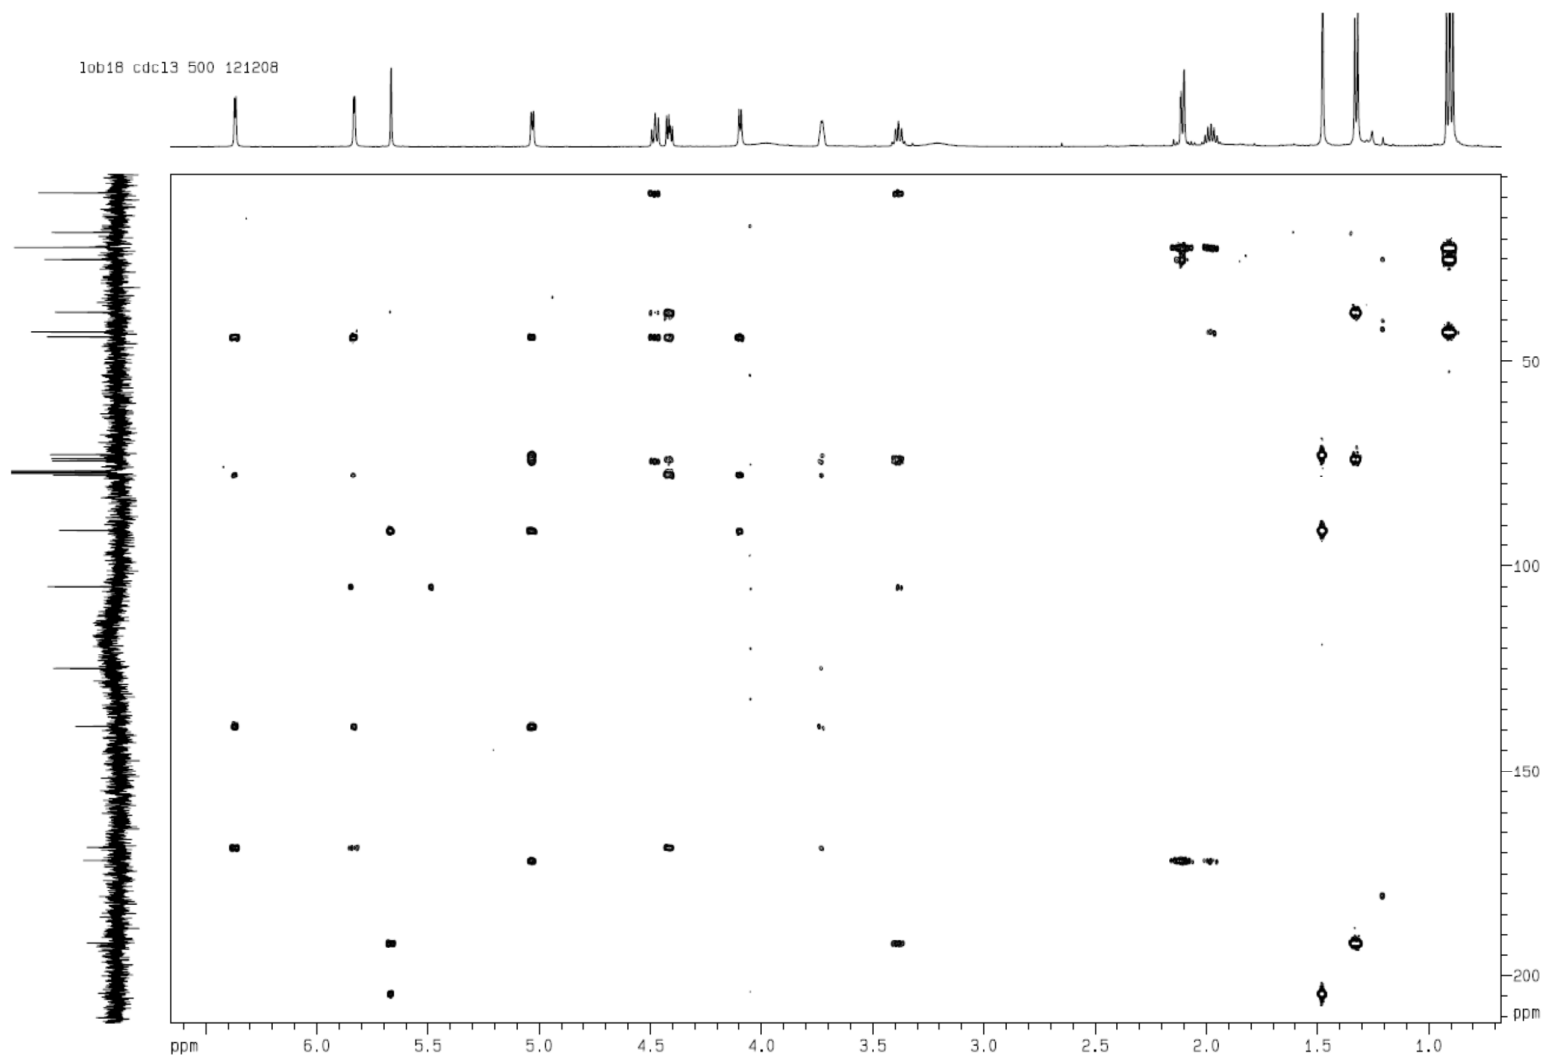



<sup>1</sup>H NMR Spectrum of 3-Epi-desacetyl-isovaleroylheliangine (4)

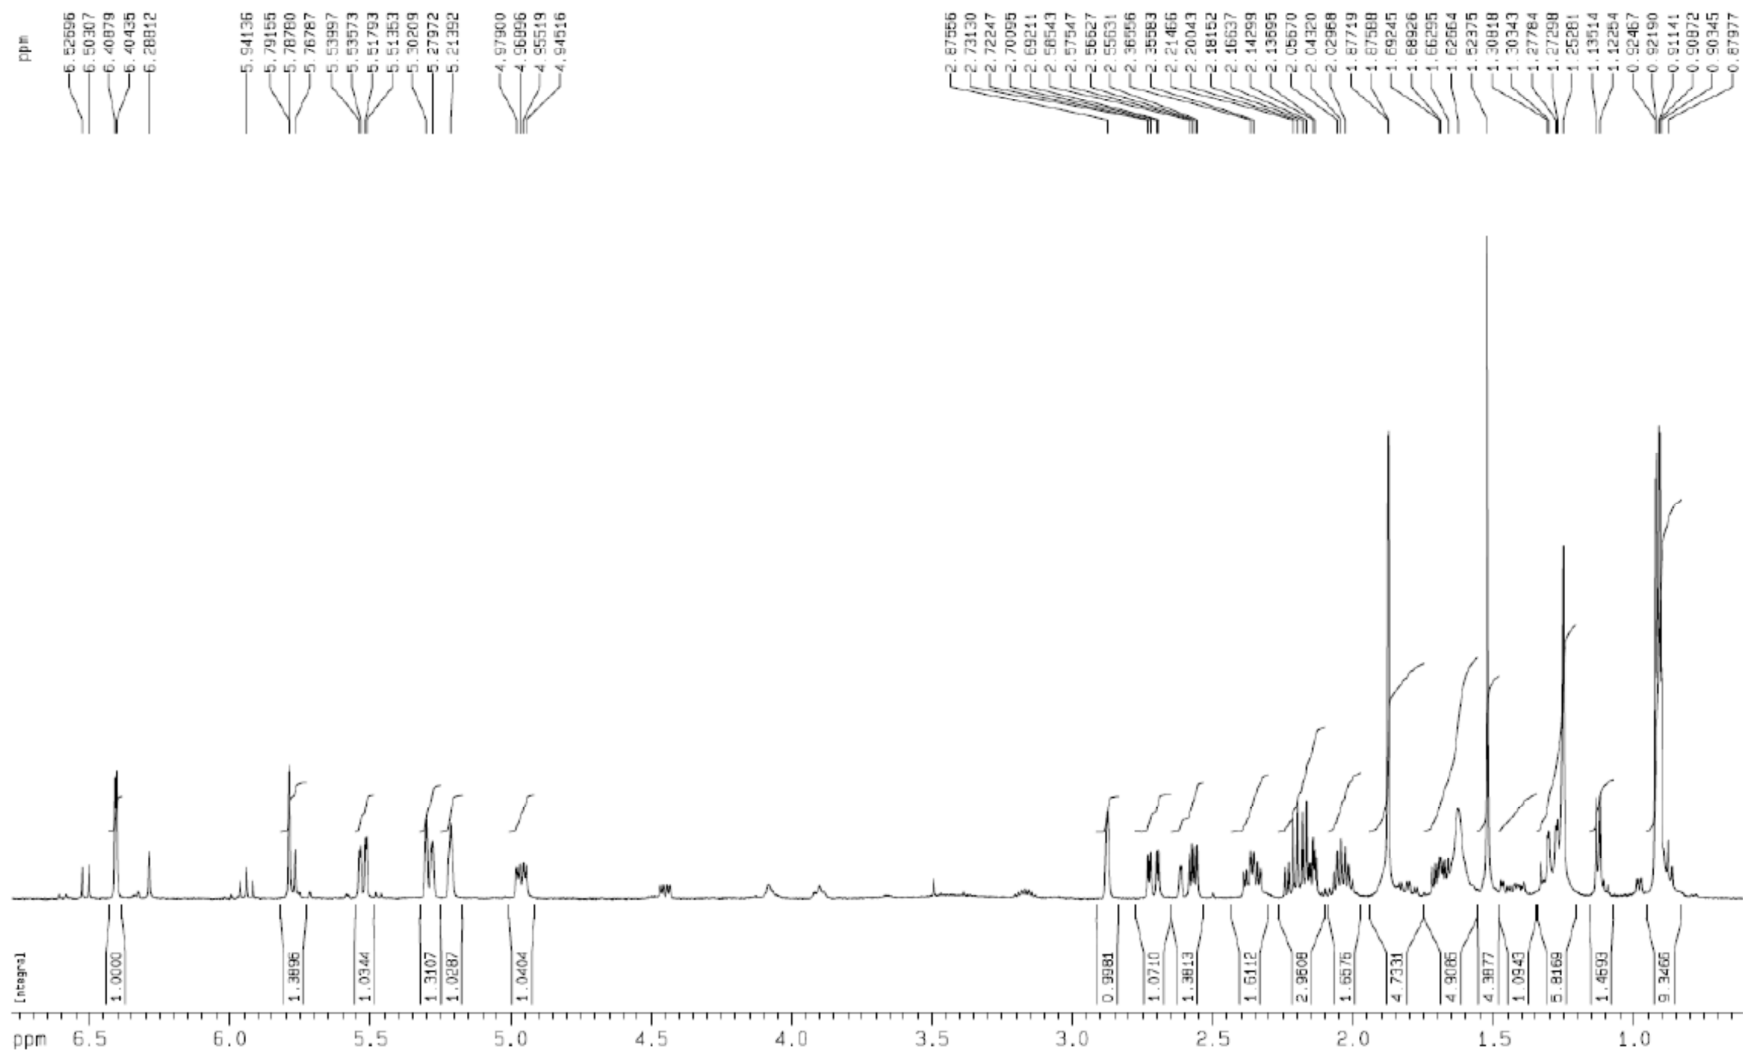

JMOD Spectrum of 3-Epi-desacetyl-isovaleroylheliangine (4)

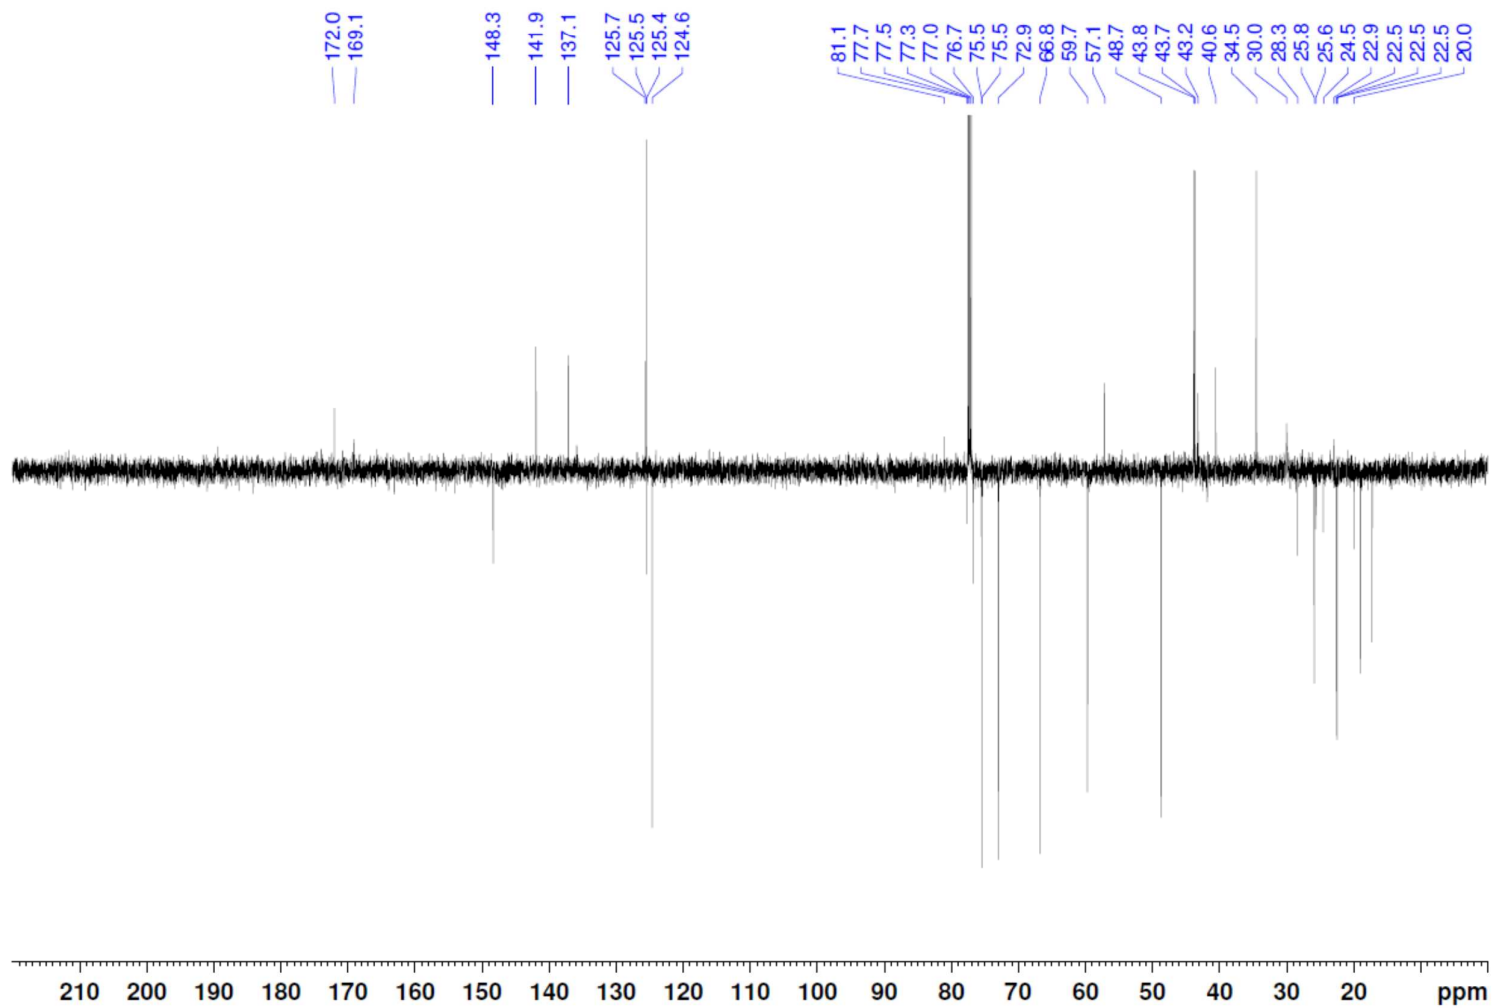

<sup>1</sup>H NMR Spectrum of 3β-Acetoxy-8β-isovaleroyloxyreynosin (5)

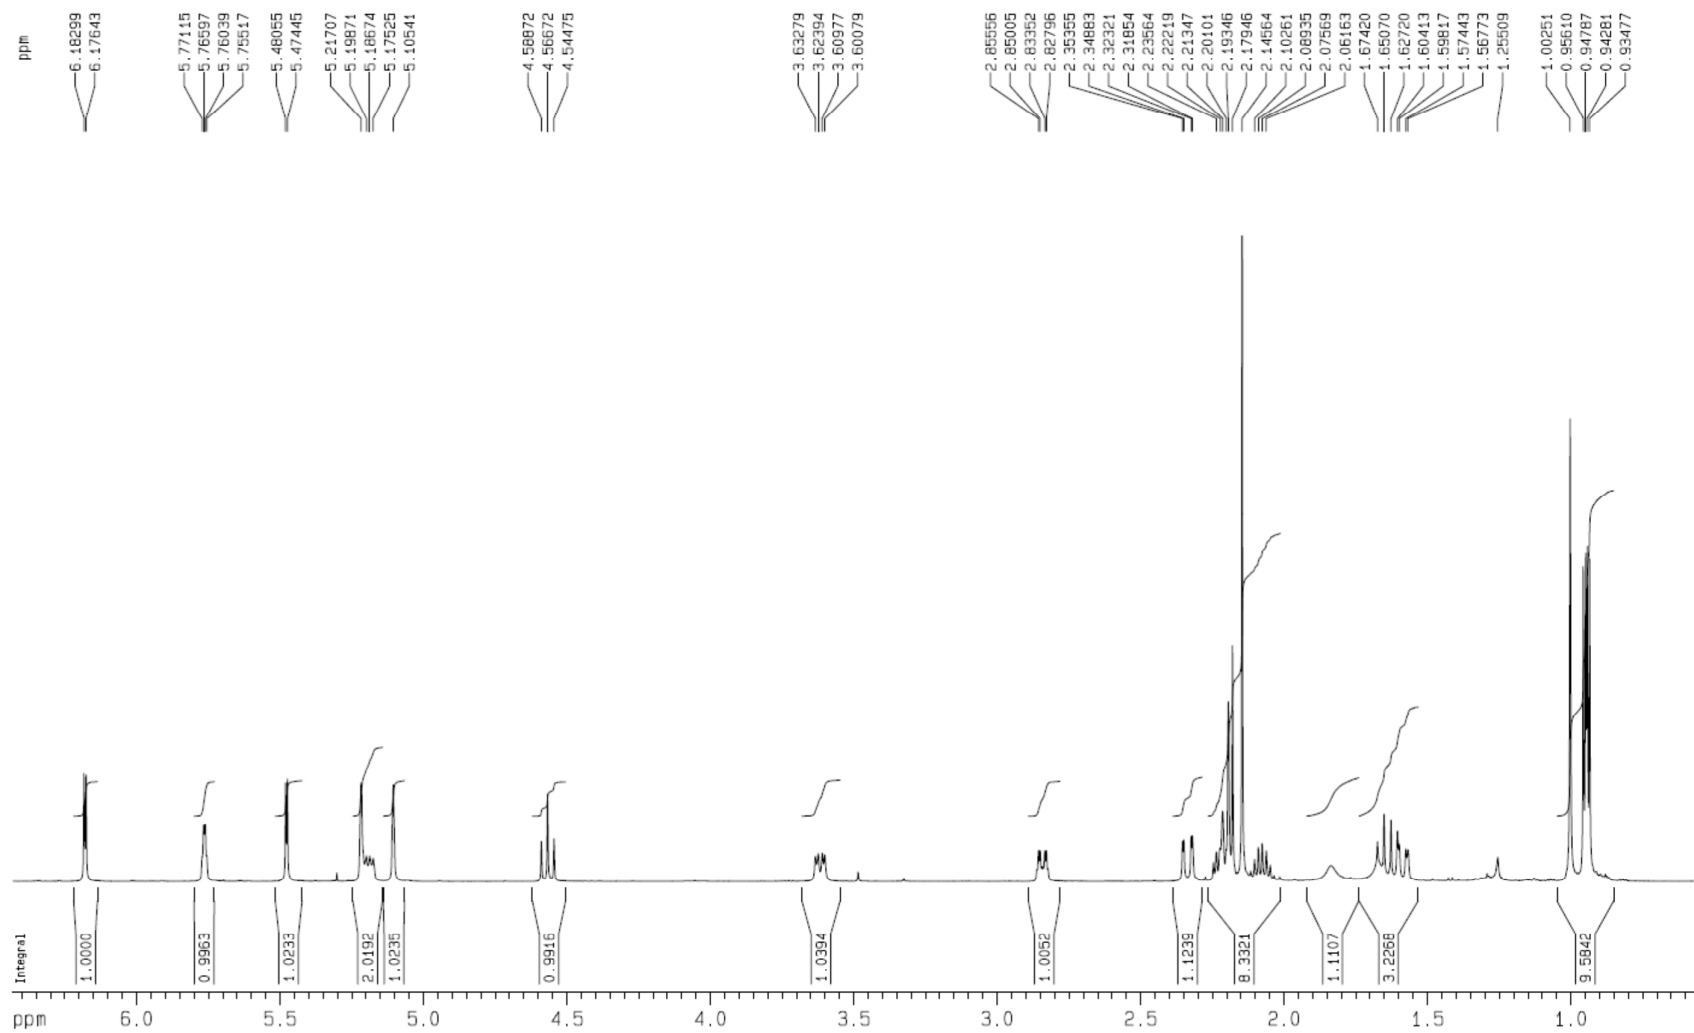

JMOD Spectrum of 3 $\beta$ -Acetoxy-8 $\beta$ -isovaleroyloxyreynosin (5)

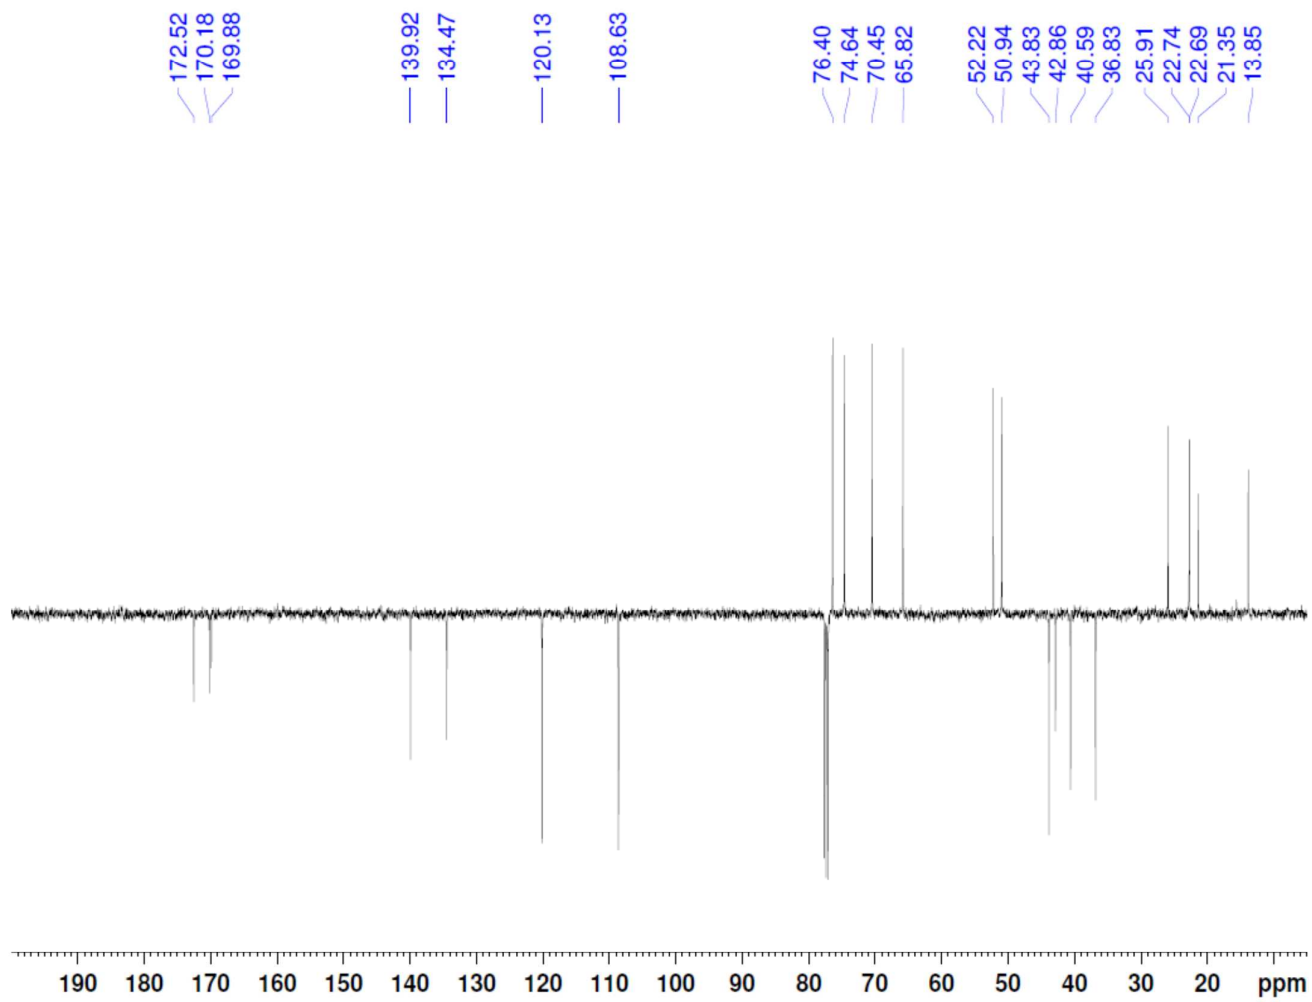

Supplement: np400834c_si_001.pdf [file np400834c_si_001.pdf]
